# Supplementary material for: Methylenetetrahydrofolate reductase (MTHFR) polymorphisms in andrology—a narrative review
Source: PubMed Central journal article supplement — Transl Androl Urol. 2024 Aug 23;13(8):1592–601. doi: 10.21037/tau-24-153 (PMC11399056; doi:10.21037/tau-24-153), 2024-08-23
Supplement: tau-13-08-1592-rc.pdf [file tau-13-08-1592-rc.pdf]

## Narrative Review Checklist

| Section/Topic             | Item No | Item                                                                                                                                                                               | Reported on Page Number/Line Number | Reported on Section/Paragraph          |
|---------------------------|---------|------------------------------------------------------------------------------------------------------------------------------------------------------------------------------------|-------------------------------------|----------------------------------------|
| <b>TITLE</b>              |         |                                                                                                                                                                                    |                                     |                                        |
| Title                     | 1       | Identify the report as a Narrative Review or Literature Review.                                                                                                                    | Page 1, Line 2-3                    | Title                                  |
| <b>ABSTRACT</b>           |         |                                                                                                                                                                                    |                                     |                                        |
| Structured summary        | 2       | Provide a structured summary with the subsections as: Background and Objective, Methods, Key Content and Findings, Conclusions.                                                    | Page 2, Line 18- Page 3, Line 47    | Abstract/ paragraph 1-4                |
| <b>INTRODUCTION</b>       |         |                                                                                                                                                                                    |                                     |                                        |
| Rationale/background      | 3       | Describe the rationale for the review in the context of what is already known.                                                                                                     | Page 4, Line 49- Page 5, Line 83    | Introduction/paragraph 1-4             |
| Objectives                | 4       | Specify the key question(s) identified for the review topic.                                                                                                                       | Page 5, Line 84-Page 6, Line 88.    | Introduction/paragraph 5               |
| <b>METHODS</b>            |         |                                                                                                                                                                                    |                                     |                                        |
| Research selection        | 5       | Specify the process for identifying the literature search (eg, years considered, language, publication status, study design, and databases of coverage).                           | Page 6 Line 90-Page 6 Line 100      | Method/ paragraph 1                    |
| <b>DISCUSSION/SUMMARY</b> |         |                                                                                                                                                                                    |                                     |                                        |
| Narrative                 | 6       | Discuss: 1) research reviewed including fundamental or key findings, 2) limitations and/or quality of research reviewed, and 3) need for future research.                          | Page 8, Line 102-Page 15, Line 296. | Results and Discussion/ paragraph 1-16 |
| Summary                   | 7       | Provide an overall interpretation of the narrative review in the context of clinical practice for health professionals, policy development and implementation, or future research. | Page 15, Line 298- 306              | Conclusion/ paragraph 1                |

Article Information: <https://dx.doi.org/10.21037/tau-24-153>

\*As the checklist was provided upon initial submission, the page number/line number reported may be changed due to copyediting and may not be referable in the published version. In this case, the section/paragraph may be used as an alternative reference.
